# Supplementary material for: CRTAM Protects Against Intestinal Dysbiosis During Pathogenic Parasitic Infection by Enabling Th17 Maturation
Source: Front Immunol. 2019 Jul 2;10:1423. doi: 10.3389/fimmu.2019.01423 (PMC6614434; doi:10.3389/fimmu.2019.01423)
Supplement: Supplementary file 2 [file Table_1.xlsx]

## Sheet: CAPTION
Table S1.
16S sequencing of ileal content of WT naïve, CRTAM-/- naïve, WT infected with T. gondii at day 8, and CRTAM infected swith T. gondii D*. (N=4)

## Sheet: Genotype_otu_table_sorted_L2
	WT naïve	WT naïve	WT naïve	WT naïve	CRTAM naïve	CRTAM naïve	CRTAM naïve	CRTAM naïve	WT D8	WT d8	WT d8	WT d8	Crtam d8	Crtam d8	Crtam d8	Crtam d8
#OTU ID	101	102	103	104	105	106	107	108	117	118	119	120	121	122	123	124
Unassigned;Other	0	0	0	0	0	0	0	0	0	0	0	0	0.0011679	0.00304077	3.97298e-05	0
k__Bacteria;p__Actinobacteria	0.03183	0.0133385	0.00613399	0.0132289	0.0139197	0.0191862	0.0395327	0.0362501	0.000843585	0	0	0	0.000513875	0	0	0
k__Bacteria;p__Bacteroidetes	0.647525	0.778296	0.745479	0.731566	0.795125	0.670826	0.569182	0.631894	0.00604569	0.0302617	0.0687992	4.96352e-05	0.177987	0.0672061	0.0486691	0.0660311
k__Bacteria;p__Cyanobacteria	9.97805e-05	0.000647501	0.000876285	0.000355935	0	0	0	0.000533874	0.0232689	0.0550744	0.136428	0.0233782	0.00056059	0.00932845	0.00361542	0.108324
k__Bacteria;p__Deferribacteres	0	0.00032375	0.000318649	5.93225e-05	0.000130702	6.26999e-05	0	0.00555229	0	0	0.000796178	0	0.0195272	0.125393	7.94597e-05	0
k__Bacteria;p__Firmicutes	0.261774	0.169839	0.19095	0.206976	0.141615	0.239952	0.331045	0.262559	0.969385	0.90276	0.7648	0.976125	0.0343362	0.233057	0.110568	0.792437
k__Bacteria;p__Proteobacteria	0.0534324	0.0363895	0.0454871	0.0466868	0.0461378	0.068719	0.0596312	0.0597405	0.000281195	0.00382732	0.00650993	0.000446717	0.765393	0.558058	0.837028	0.0137565
k__Bacteria;p__Tenericutes	0	0	0	0	0	0	0	0	0.000105448	0.00227044	0.0135819	0	0.000233579	0.00391692	0	0.00479877
k__Bacteria;p__Verrucomicrobia	0.00533826	0.0011655	0.0107544	0.00112713	0.00307149	0.001254	0.000609047	0.00347018	7.02988e-05	0.00580584	0.0090858	0	0.000280295	0	0	0.0146522

## Sheet: Genotype_otu_table_sorted_L4
# Constructed from biom file	WT naïve	WT naïve	WT naïve	WT naïve	CRTAM naïve	CRTAM naïve	CRTAM naïve	CRTAM naïve	WT D8	WT d8	WT d8	WT d8	Crtam d8	Crtam d8	Crtam d8	Crtam d8
#OTU ID	101	102	103	104	105	106	107	108	117	118	119	120	121	122	123	124
Unassigned;Other;Other;Other	0	0	0	0	0	0	0	0	0	0	0	0	0.0011679	0.00304077	3.97298e-05	0
k__Bacteria;p__Actinobacteria;c__Actinobacteria;o__Bifidobacteriales	0.00379166	0.001554	0.000637298	0.0013051	0.00156842	0.00219449	0.00941255	0.00758102	0.000843585	0	0	0	0	0	0	0
k__Bacteria;p__Actinobacteria;c__Coriobacteriia;o__Coriobacteriales	0.0280383	0.0117845	0.00549669	0.0119238	0.0123513	0.0169917	0.0301201	0.0286691	0	0	0	0	0.000513875	0	0	0
k__Bacteria;p__Bacteroidetes;c__Bacteroidia;o__Bacteroidales	0.647525	0.778296	0.745479	0.731566	0.795125	0.670826	0.569182	0.631894	0.00604569	0.0302617	0.0687992	4.96352e-05	0.177987	0.0672061	0.0486691	0.0660311
k__Bacteria;p__Bacteroidetes;c__Sphingobacteriia;o__Sphingobacteriales	0	0	0	0	0	0	0	0	0	0	0	0	0	0	0	0
k__Bacteria;p__Cyanobacteria;c__Chloroplast;o__CAB-I	0	0	0	0	0	0	0	0	0.0232689	0.0544257	0.130105	0.0202015	0.00056059	0.00932845	0.00349623	0.0935441
k__Bacteria;p__Cyanobacteria;c__Chloroplast;o__Streptophyta	9.97805e-05	0.000647501	0.000876285	0.000355935	0	0	0	0.000533874	0	0.000648698	0.00632259	0.00317665	0	0	0.00011919	0.0147802
k__Bacteria;p__Deferribacteres;c__Deferribacteres;o__Deferribacterales	0	0.00032375	0.000318649	5.93225e-05	0.000130702	6.26999e-05	0	0.00555229	0	0	0.000796178	0	0.0195272	0.125393	7.94597e-05	0
k__Bacteria;p__Firmicutes;c__Bacilli;o__Bacillales	0.00488924	0.00123025	0.000238987	0.000355935	0.000392106	0.000250799	0	0.000106775	0.0238664	0.000810872	0.000281004	4.96352e-05	0	0	3.97298e-05	0.00307121
k__Bacteria;p__Firmicutes;c__Bacilli;o__Lactobacillales	0.0703951	0.0457783	0.00708994	0.0538649	0.0267285	0.038435	0.0596866	0.0496503	0.390334	0.391749	0.638207	0.974736	0.0109315	0.080503	0.110489	0.305138
k__Bacteria;p__Firmicutes;c__Bacilli;o__Turicibacterales	0	0	0	0	0	0	0	0	0.277996	0.414453	4.6834e-05	0	0.000140148	0	0	0
k__Bacteria;p__Firmicutes;c__Clostridia;o__Clostridiales	0.0398124	0.0871536	0.177328	0.0886279	0.0522807	0.121136	0.0836609	0.0769313	0.277188	0.0957478	0.126265	0.00134015	0.0232645	0.152554	3.97298e-05	0.484228
k__Bacteria;p__Firmicutes;c__Erysipelotrichi;o__Erysipelotrichales	0.146677	0.0356773	0.00629332	0.0641277	0.0622141	0.0801304	0.187697	0.135871	0	0	0	0	0	0	0	0
k__Bacteria;p__Proteobacteria;c__Alphaproteobacteria;o__RF32	0.000149671	0	0	0	0	0	0	5.33874e-05	7.02988e-05	0.00382732	0.000749344	9.92704e-05	0.025974	0.00097923	3.97298e-05	0.00339113
k__Bacteria;p__Proteobacteria;c__Alphaproteobacteria;o__Rhizobiales	0	0	0	0	0	0	0	0	0	0	0	0	0	0	0	0
k__Bacteria;p__Proteobacteria;c__Alphaproteobacteria;o__Sphingomonadales	0	0	0	0	0	0	0	0	0	0	0	0	0	0	0	0
k__Bacteria;p__Proteobacteria;c__Betaproteobacteria;o__Burkholderiales	0.0304829	0.0135328	0.0124273	0.0281189	0.0143772	0.0262085	0.021815	0.0242913	0	0	0	0	0.00107447	5.15384e-05	0	0.000319918
k__Bacteria;p__Proteobacteria;c__Deltaproteobacteria;o__Desulfovibrionales	0.0227998	0.020979	0.0329802	0.018568	0.0316952	0.0425105	0.0378163	0.0350222	0	0	0	0	0	0	0	0
k__Bacteria;p__Proteobacteria;c__Epsilonproteobacteria;o__Campylobacterales	0	0	0	0	0	0	0	0	0	0	0	0	0	0	0	0
k__Bacteria;p__Proteobacteria;c__Gammaproteobacteria;o__Enterobacteriales	0	0.00187775	7.96622e-05	0	6.53509e-05	0	0	0.000160162	0	0	0.00309105	4.96352e-05	0.738344	0.557027	0.836353	0.00927762
k__Bacteria;p__Proteobacteria;c__Gammaproteobacteria;o__Pseudomonadales	0	0	0	0	0	0	0	0.00021355	0.000210896	0	0.00266954	0.000297811	0	0	0.000635677	0.000767803
k__Bacteria;p__Tenericutes;c__Mollicutes;o__Anaeroplasmatales	0	0	0	0	0	0	0	0	0.000105448	0.00227044	0.0135819	0	0.000233579	0.00391692	0	0.00479877
k__Bacteria;p__Verrucomicrobia;c__Verrucomicrobiae;o__Verrucomicrobiales	0.00533826	0.0011655	0.0107544	0.00112713	0.00307149	0.001254	0.000609047	0.00347018	7.02988e-05	0.00580584	0.0090858	0	0.000280295	0	0	0.0146522
